# Supplementary material for: Probing single-chain conformation and its impact on the optoelectronic properties of donor–accepter conjugated polymers
Source: Royal Society of Chemistry journal article supplement (doi:10.1039/d2ta09389h), 2023-01-01
Supplement: d2ta09389h1.pdf [file d2ta09389h1.pdf]

## Supporting Information

### Probing Single-chain Conformation and Its Impact on Optoelectronic Properties of Donor-Acceptor Conjugated Polymers

**Zhiqiang Cao,<sup>a†</sup> Zhaofan Li,<sup>b†</sup> Sara A. Tolba,<sup>b</sup> Gage T. Mason,<sup>c</sup> Miao Xiong,<sup>d</sup> Michael U. Ocheje,<sup>c</sup> Amirhadi Alesadi,<sup>b</sup> Changwoo Do,<sup>c</sup> Kunlun Hong,<sup>f</sup> Ting Lei,<sup>d</sup> Simon Rondeau-Gagné,<sup>c</sup> Wenjie Xia,<sup>\*b</sup> Xiaodan Gu<sup>\*a</sup>**

- a. School of Polymer Science and Engineering, The University of Southern Mississippi, Hattiesburg, MS 39406, USA. E-mail: [xiaodan.gu@usm.edu](mailto:xiaodan.gu@usm.edu)
- b. Department of Civil, Construction, and Environmental Engineering, North Dakota State University, Fargo, ND 58108, USA. E-mail: [wenjie.xia@ndsu.edu](mailto:wenjie.xia@ndsu.edu)
- c. Department of Chemistry and Biochemistry, Advanced Materials Centre of Research (AMCORE), University of Windsor, Windsor, Ontario, N9B3P4, Canada.
- d. School of Material Science and Engineering, Peking University, Beijing 100871, China.
- e. Neutron Scattering Division, Oak Ridge National Laboratory, Oak Ridge, TN 37831, USA.
- f. Center for Nanophase Materials Sciences, Oak Ridge National Laboratory, Oak Ridge, TN 37831, USA.

† These authors contributed equally to this work.

---

\* Corresponding authors. E-mail address: [xiaodan.gu@usm.edu](mailto:xiaodan.gu@usm.edu); [wenjie.xia@ndsu.edu](mailto:wenjie.xia@ndsu.edu)

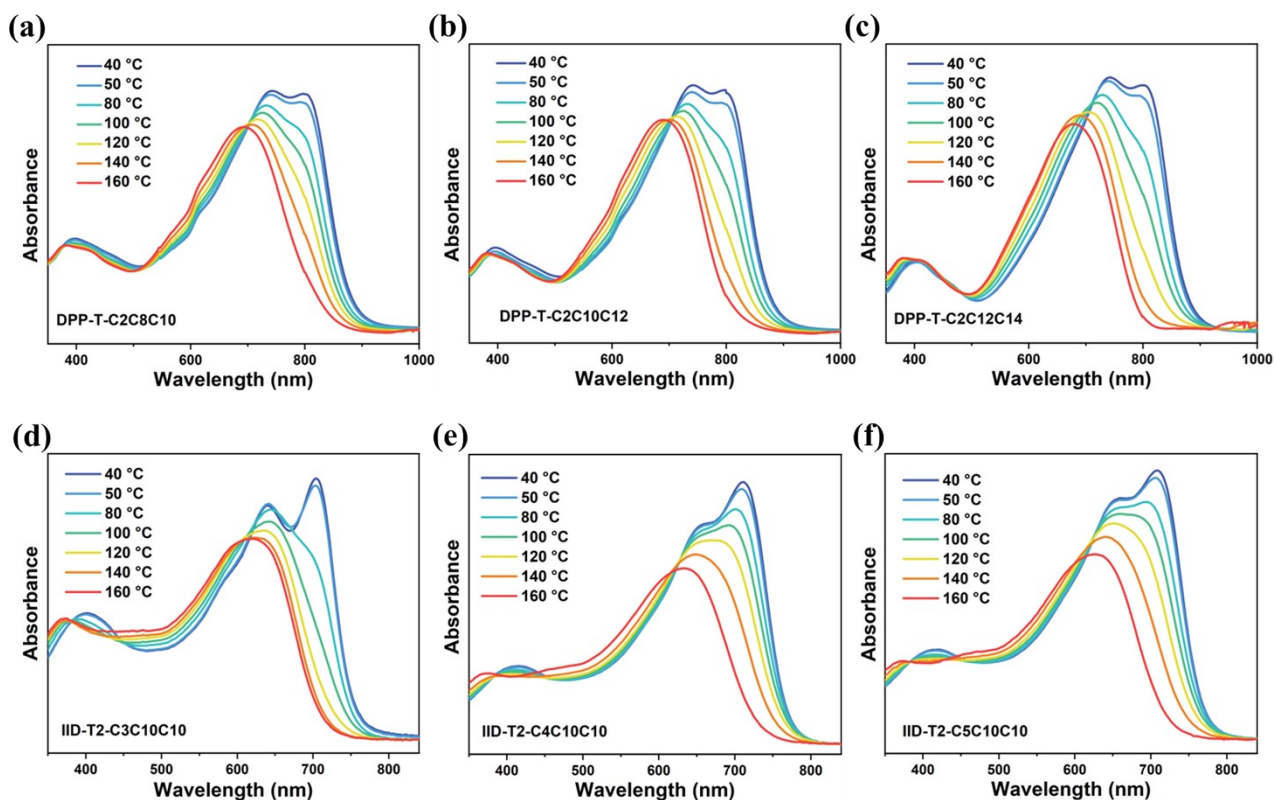

Figure S1. Temperature-dependent UV-vis for DPP-based and IID-based polymer solution in *o*-DCB. (0.1 mg/ml)

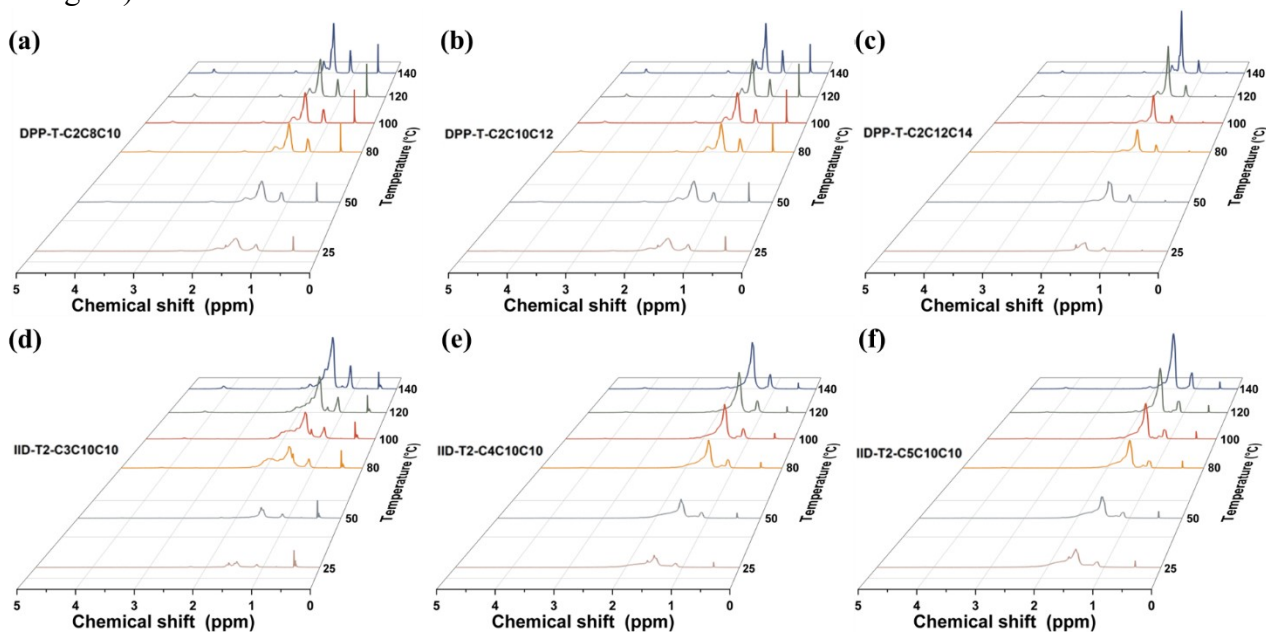

Figure S2.  $^1\text{H}$  NMR spectra of DPP-based and IID-based polymer solution in *o*-DCB- $d_4$  (5 mg/ml).

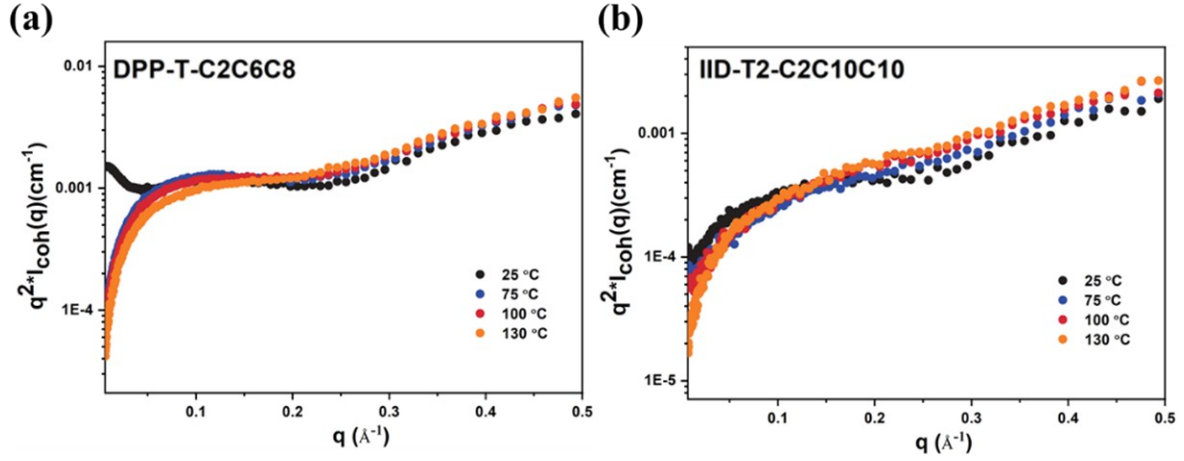

Figure S3. Kratky plots for (a) DPP-T-C2C6C8 and (b) IID-T2-C2C10C10.

For SANS curves measured below 130 °C, we used a combined model of flexible cylinder model (for single chains) and parallelepiped model:

$$I(q) = A_1 K_{para}^2 P_{para}(A, B, C, q) + A_2 K_{cyl}^2 P_{cyl}(L_c, l_p, R, q) + Background \quad (1)$$

in which  $A_1, A_2$  are the scaling factors corresponding to the volume fraction of the particles;  $K_{cyl}$  and  $K_{para}$  are the scattering contrast; A, B, C are the thickness, width, and length of the parallelepiped;  $L_c, l_p, R$  is the contour length, persistence length and radius of the flexible cylinder, respectively.

### Persistence length calculation in MD

We performed the persistence length  $l_p$  calculation by considering the center-of-mass of consecutive functional groups (*i.e.*, DPP-core and thiophene ring for DPP based polymers, and isoindigo unit and thiophene ring for IID based polymers) along the backbone chain contour.  $\mathbf{v}_s$  was denoted as the tangent vector connecting two segments  $s$  and  $s+1$ , and the  $l_p$  was determined from the tangent-tangent correlation function  $\langle \mathbf{v}_0 \cdot \mathbf{v}_s \rangle$  with the average taken over all trajectories<sup>1,2</sup>:

$$\langle \mathbf{v}_0 \cdot \mathbf{v}_s \rangle = e^{-s/n_p} \quad (2)$$

where  $n_p$  is the persistence length measured in the number of monomers.  $l_p$  is taken as  $l_p = l_0 n_p$ , in which  $l_0$  is the average monomer repeat unit length.

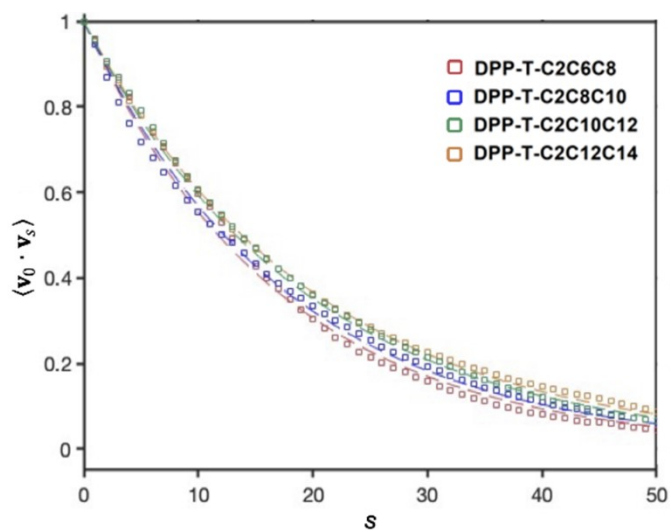

Figure S4. The  $l_p$  was determined from the tangent-tangent correlation function.

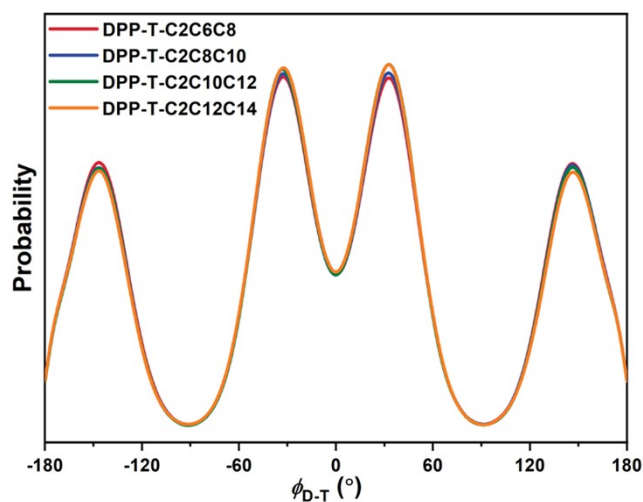

Figure S5. DPP-thiophene dihedral angle distributions from AA-MD simulation.

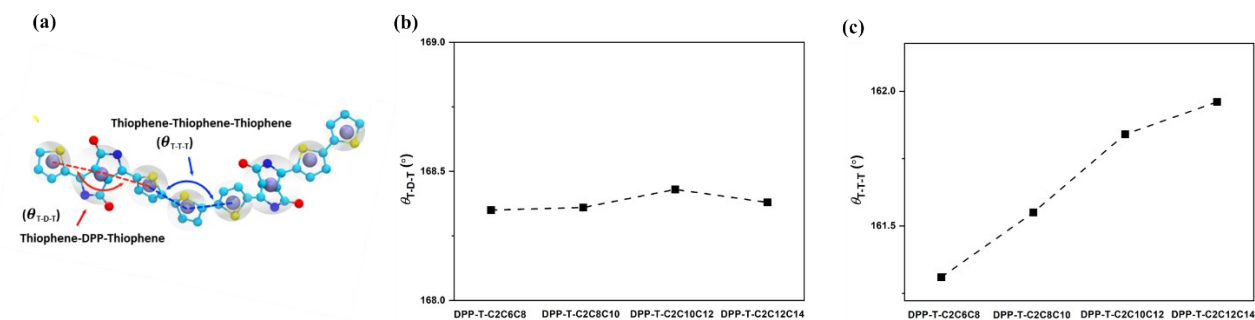

Figure S6. (a) Schematic definition of the bending angle. Grey beads denote the center of mass of each functional group. (b) Averaged bending angle between DPP-thiophene rings. (c) Averaged bending angle between thiophene-thiophene rings.

Furthermore, we also studied the averaged bending angles along the backbone chain, as measured by the angle formed by three consecutive center-of-mass of functional groups, including  $\theta_{T-T-T}$  and  $\theta_{T-D-T}$  (as labeled in **Figure 6c**). An increased averaged bending angle  $\theta_{T-T-T}$  has been found with increasing side-chain length (**Figure 6e**), indicating that the growth of the side-chain length favors less bending and leads to more planar conformations of the polymer backbone.

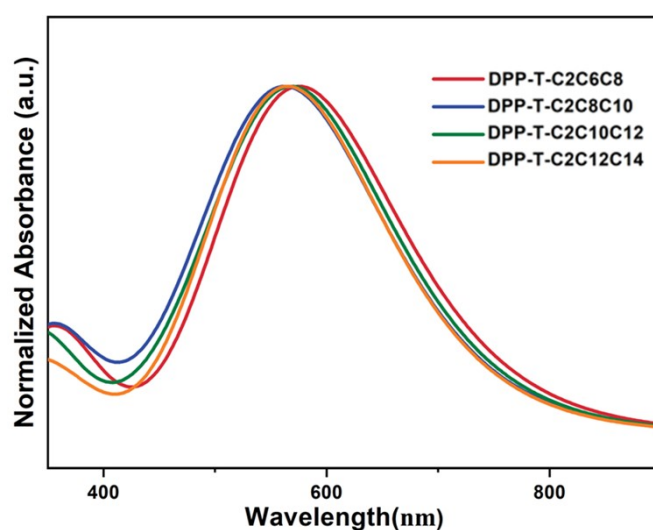

Figure S7. DFT calculated optical absorption based on the optimized ground-state electronic structure of DPP dimers.

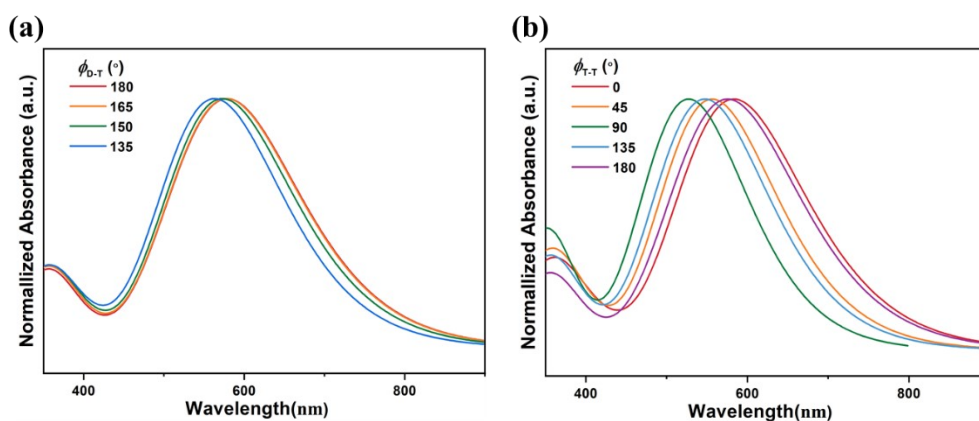

Figure S8. DFT calculated UV-vis spectrum of DPP-T-C2C6C8 backbone with twisted  $\phi_{T-T}$  and  $\phi_{D-T}$  dihedral angles.

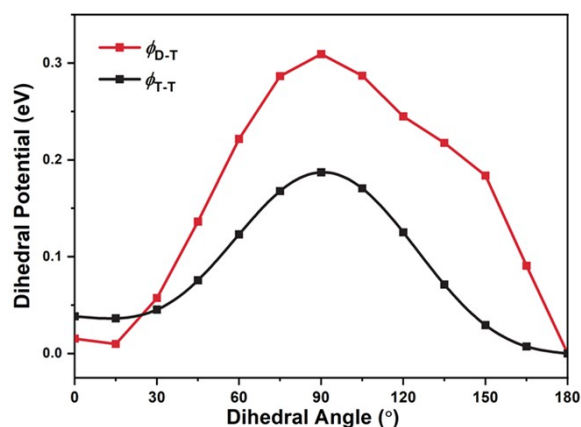

Figure S9. Dihedral potential for a DPP-based trimer.

$\phi_{T-T}$  and  $\phi_{D-T}$  dihedral angles potential energy surfaces were calculated (Figure S8). The dihedral potential between DPP-thiophene units shows a sharper increase than the dihedral potential between thiophene-thiophene units when deviating coplanar conformations, which indicates the formation of oxygen-sulfur and oxygen-hydrogen interactions.<sup>3</sup> Such nonbonding interactions are expected to reduce the conformational disorder and promote the planar conformation.<sup>4</sup>

Table S1. Values calculated for the dihedral angles (in degrees) of DPP-based dimers.

|                | $\phi_{T-T}$ | $\phi_{D-T}$ |
|----------------|--------------|--------------|
| DPP-T-C2C6C8   | 171          | 162          |
| DPP-T-C2C8C10  | 173          | 161          |
| DPP-T-C2C10C12 | 179          | 158          |
| DPP-T-C2C12C14 | 176          | 154          |

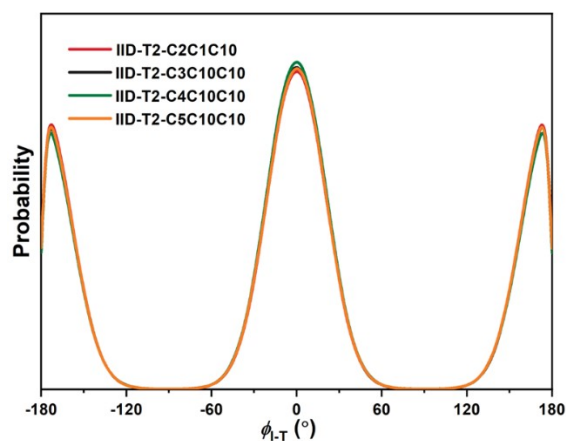

Figure S10. IID-thiophene dihedral angle distributions from AA-MD simulation.

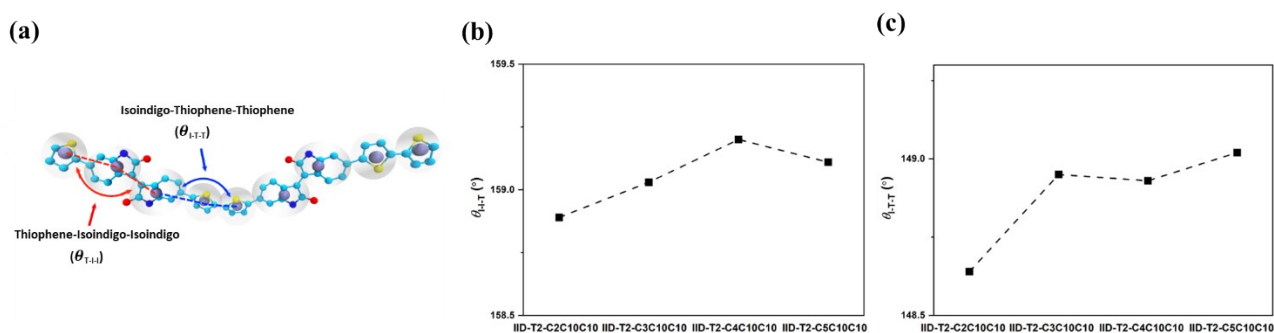

Figure S11. (a) Schematic definition of the bending angles. Grey beads denote the center of mass of each functional group. (b) Averaged bending angle between IID-thiophene rings for IID-based polymers. (c) Averaged bending angle between thiophene-thiophene rings for IID-based polymers.

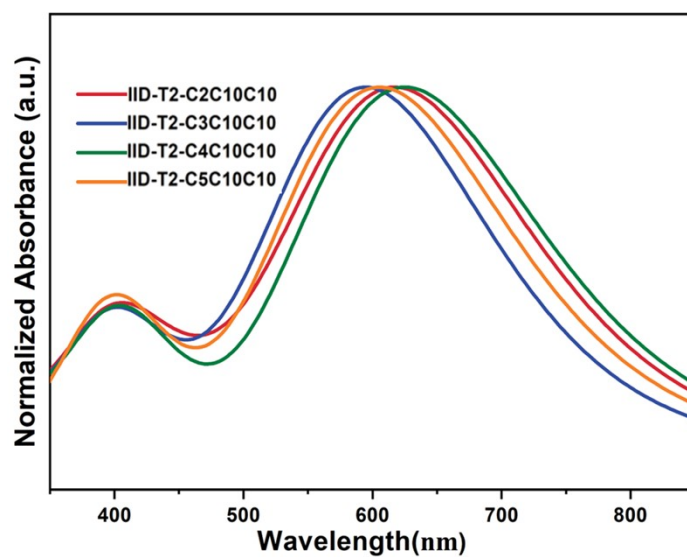

Figure S12. DFT calculated optical absorption based on the optimized ground-state electronic structure of IID trimers.

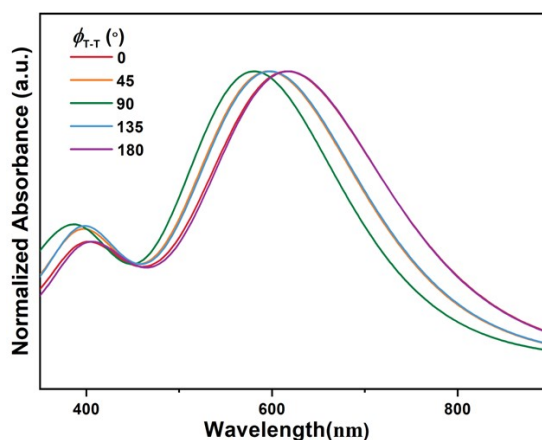

Figure S13. DFT calculated UV-vis spectrum of IID-T2-C2C10C10 backbone with twisted T-T dihedral angles.

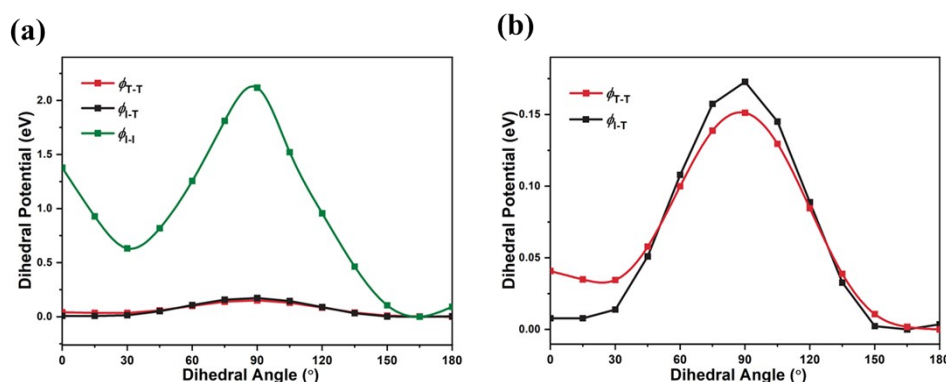

Figure S14. Dihedral potential for a IID-based trimer.

Dihedral potential between IID-thiophene units has global minimum at  $0^\circ$  and a local minimum at  $170^\circ$ . Dihedral potential between thiophene-thiophene units shows a global minimum at the trans state ( $180^\circ$ ) and a local minimum at the cis state ( $0^\circ$ ).  $\phi_{T-T}$ ,  $\phi_{I-T}$ , and  $\phi_{I-I}$  dihedral angle potential energy surfaces were also calculated (**Figure S12**). Our calculations show that intra-acceptor dihedral potential ( $\phi_{I-I}$ ) has a global minimum of around  $165^\circ$ . Thanks to the double-bond connection, as well the interactions between O atom in the electron-deficient lactam core and a proximal H atom, the rotational energy barrier inside the isoindigo unit is high. Such a high



rotational energy barrier is expected to reduce the conformational disorder and promote the planar conformation.

Table S2. Values calculated for the dihedral angles (in degrees).

|                 | $\phi_{T-T}$ | $\phi_{I-T}$ | $\phi_{I-I}$ |
|-----------------|--------------|--------------|--------------|
| IID-T2-C2C10C10 | 171          | 165          | 164          |
| IID-T2-C3C10C10 | 163          | 163          | 160          |
| IID-T2-C4C10C10 | 170          | 169          | 161          |
| IID-T2-C5C10C10 | 164          | 166          | 163          |

### References:

- (1) Tsourtou, F. D.; Peristeras, L. D.; Apostolov, R.; Mavrantzas, V. G. Molecular Dynamics Simulation of Amorphous Poly ( 3- Hexylthiophene ). *Macromolecules* **2020**, *53*, 7810–7824. <https://doi.org/10.1021/acs.macromol.0c00454>.
- (2) Zhang, W.; Gomez, E. D.; Milner, S. T. Predicting Nematic Phases of Semiflexible Polymers. *Macromolecules* **2015**, *48* (5), 1454–1462. <https://doi.org/10.1021/acs.macromol.5b00013>.
- (3) Jackson, N. E.; Savoie, B. M.; Kohlstedt, K. L.; Olvera, M.; Cruz, D.; Schatz, G. C.; Chen, L. X.; Ratner, M. A. Controlling Conformations of Conjugated Polymers and Small Molecules : The Role of Nonbonding Interactions. *J. Am. Chem. Soc.* **2013**, *135* (28), 10475–10483.
- (4) Mikie, T.; Okamoto, K.; Iwasaki, Y.; Koganezawa, T.; Sumiya, M.; Okamoto, T.; Osaka, I. Naphthobispyrazine Bisimide: A Strong Acceptor Unit for Conjugated Polymers Enabling Highly Coplanar Backbone, Short  $\Pi$ - $\pi$  Stacking, and High Electron Transport. *Chem. Mater.* **2022**, *34* (6), 2717–2729. <https://doi.org/10.1021/acs.chemmater.1c04196>.
